# Supplementary material
Source: Springer Nature journal article supplement (https://www.springermedizin.de/resource/supplementary/12986_2011_367_MOESM1_ESM.pdf/25655928)
Supplement: MOESM1 [file 25655928]

MPS and MPB

- MPS in young
- - - MPB in young and elderly
- MPS in elderly

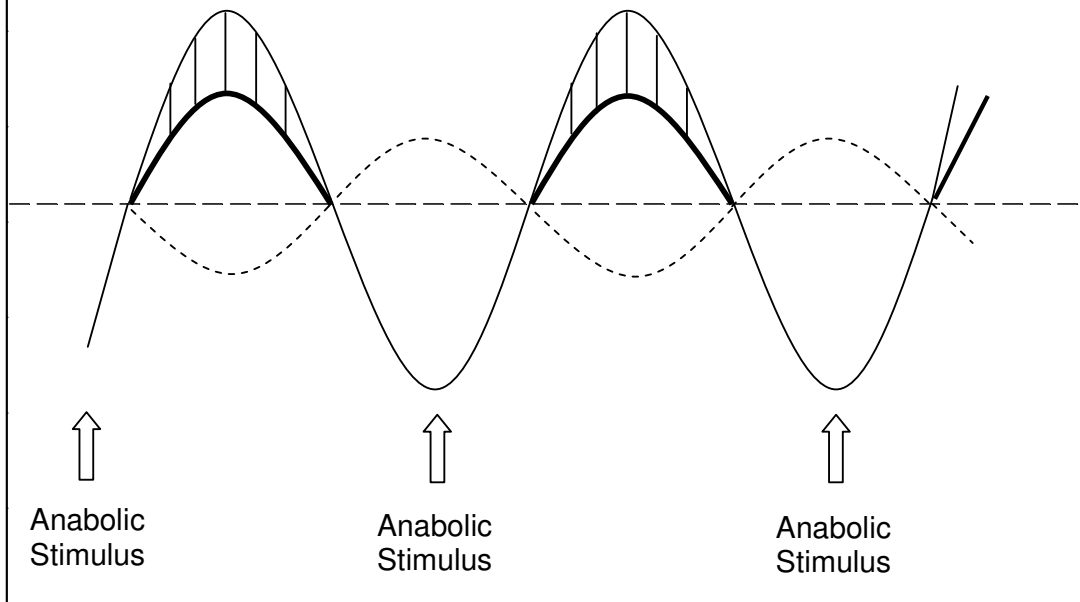

Anabolic  
Stimulus

Anabolic  
Stimulus

Anabolic  
Stimulus
